# Supplementary material
Source: publisher figshare collection journal article supplement (https://acs.figshare.com/ndownloader/files/11203016)
Supplement: Supplementary file 1 [file 11203016]

## Supporting Information

### An Effective Purification Process for the Nuclear Radiation Detector $\text{Tl}_6\text{SeI}_4$

Wenwen Lin,<sup>†</sup> Oleg Y. Kontsevoi,<sup>§,‡</sup> Zhifu Liu,<sup>‡</sup> Sanjib Das,<sup>‡</sup> Yihui He,<sup>†</sup> Yadong Xu,<sup>†</sup> Constantinos C. Stoumpos,<sup>†</sup> Kyle M. McCall,<sup>†,‡</sup> Alexander JE Rettie,<sup>※</sup> Duck Young Chung,<sup>※</sup> Bruce W. Wessels,<sup>‡</sup> and Mercuri G. Kanatzidis<sup>†,\*</sup>

<sup>†</sup>Department of Chemistry, <sup>§</sup>Department of Physics and Astronomy, <sup>‡</sup>Northwestern-Argonne Institute of Science and Engineering, <sup>‡</sup>Department of Materials Science and Engineering and Materials Research Center, Northwestern University, Evanston, Illinois 60208, United States, <sup>※</sup>Materials Science Division, Argonne National Laboratory, Argonne, IL 60439

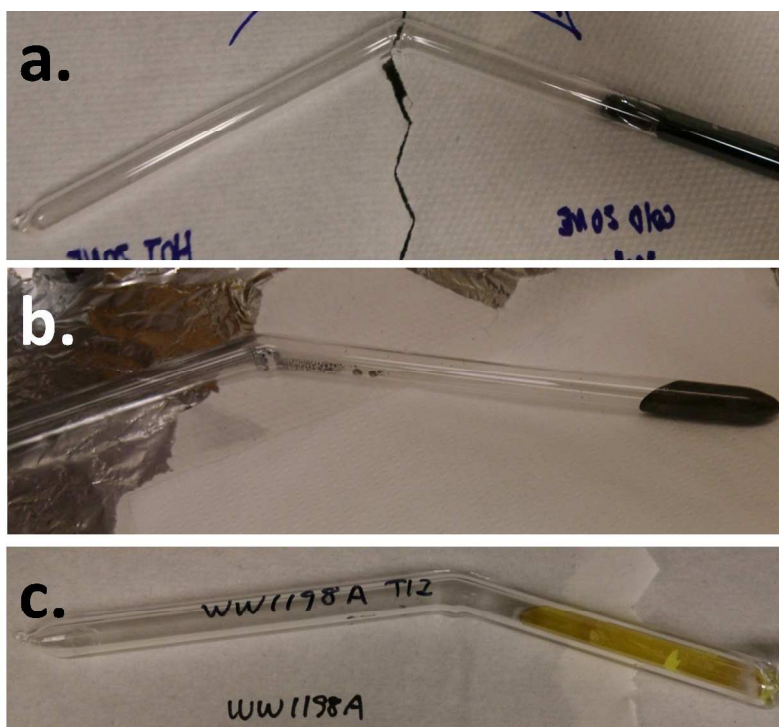

**Figure S1.** (a) Purified Se precursor. (b) Purified  $\text{Tl}_2\text{Se}$  precursor. (c) Purified  $\text{TlI}$  precursor.

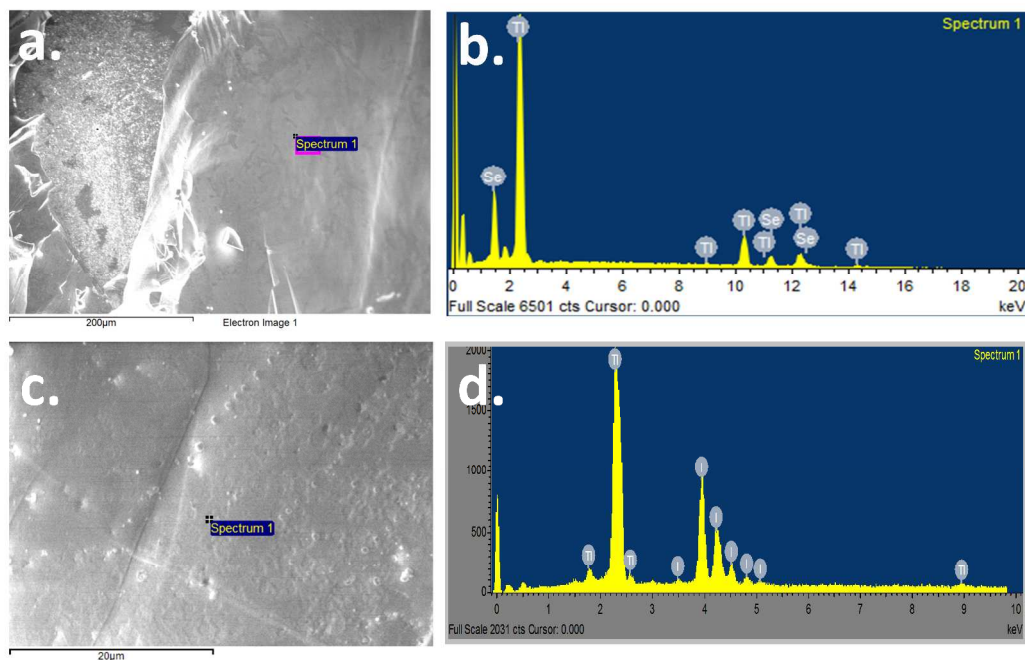

**Figure S2.** (a) SEM image of purified  $\text{Tl}_2\text{Se}$ . (b) Compositional analysis on purified  $\text{Tl}_2\text{Se}$  by EDS (Tl atomic% is 67.13%, Se atomic% is 32.87%). (c) SEM image of purified  $\text{TlI}$ . (d) Compositional analysis on purified  $\text{TlI}$  by EDS (Tl atomic% is 49.94%, I atomic% is 50.06%).
